# Supplementary material
Source: MDPI journal article supplement (https://www.mdpi.com/2071-1050/8/3/242)
Supplement: s1 [file s1]

# Supplementary Materials: The Influence of Urban Land-Use and Public Transport Facilities on Active Commuting in Wellington, New Zealand: Active Transport Forecasting Using the WILUTE Model

Joreintje Dingena Mackenbach, Edward Randal, Pengjun Zhao and Philippa Howden-Chapman

Table S1. Summary statistics of exposure measures.

| Measure              | Home meshblock      |       |                  |        | Start traffic zone      |     |                  |         | End traffic zone     |      |                  |        |
|----------------------|---------------------|-------|------------------|--------|-------------------------|-----|------------------|---------|----------------------|------|------------------|--------|
|                      | mean $\pm$ sd       | min   | 25–75 percentile | max    | mean $\pm$ sd           | min | 25–75 percentile | max     | mean $\pm$ sd        | min  | 25–75 percentile | max    |
| population density   | 24.00 $\pm$ 19.69   | 0.56  | 13.41–28.45      | 118.75 | 31.35 $\pm$ 11.84       | 0   | 0.15–2.56        | 111.84  | 22.24 $\pm$ 15.16    | 0.11 | 14.45–29.58      | 84.51  |
| housing density      | 7.31 $\pm$ 4.42     | 0.10  | 4.95–9.05        | 24.17  | 4.07 $\pm$ 2.99         | 0   | 0.90–6.08        | 11.14   | 2.82 $\pm$ 2.69      | 0    | 0.47–4.99        | 11.14  |
| apartment density    | 0.03 $\pm$ 0.17     | 0     | 0.00–0.07        | 1.04   | 0.62 $\pm$ 0.55         | 0   | 0.31–0.70        | 3.67    | 0.69 $\pm$ 0.71      | 0    | 0.39–0.70        | 3.67   |
| land-use mix         | 0.21 $\pm$ 0.70     | 0     | 0–0.08           | 6.73   | 0.04 $\pm$ 0.06         | 0   | 0.00–0.05        | 0.23    | 0.06 $\pm$ 0.07      | 0    | 0.00–0.12        | 0.23   |
| distance to CBD      | 21.08 $\pm$ 14.82   | 3.19  | 8.53–26.94       | 72.73  |                         |     |                  |         |                      |      |                  |        |
| frequency bus        | 765.46 $\pm$ 969.22 | 0     | 90.00–1069.00    | 4700   | 8242.50 $\pm$ 2,257,950 | 0   | 0–4226           | 228,883 | 10,311 $\pm$ 9672.50 | 0    | 1522–20,290      | 26,005 |
| pairs of bus stops   | 1.31 $\pm$ 1.05     | 0     | 0–2              | 4      | 23.37 $\pm$ 11.93       | 0   | 16–30            | 58      | 22.27 $\pm$ 11.14    | 0    | 14–30            | 58     |
| frequency of trains  |                     |       |                  |        | 136.23 $\pm$ 229.68     | 0   | 0–190            | 1297    | 151.72 $\pm$ 256.62  | 0    | 0–266            | 1297   |
| number rail stations |                     |       |                  |        | 0.52 $\pm$ 0.73         | 0   | 0–1              | 2       | 0.71 $\pm$ 0.79      | 0    | 0–1              | 2      |
| job accessibility    |                     |       |                  |        | 0.62 $\pm$ 0.71         | 0   | 0.10–1.24        | 3.94    | 0.90 $\pm$ 0.85      | 0    | 0.15–1.46        | 3.94   |
| Material deprivation | 4.25 $\pm$ 2.58     | 1     | 2–6              | 10     |                         |     |                  |         |                      |      |                  |        |
| parking price        |                     |       |                  |        |                         |     |                  |         | 0.68 $\pm$ 0.68      | 0    | 0–1.30           | 1.90   |
| walkability          | 36.82 $\pm$ 17.13   | 0     | 24.00–48.40      | 81     |                         |     |                  |         |                      |      |                  |        |
| transit score        | 37.60 $\pm$ 11.27   | 10.00 | 27.60–45.67      | 70.3   |                         |     |                  |         |                      |      |                  |        |

Population density, housing density, apartment density and land use mix were densities per hectare. We originally used the number of bus stops and number of rail stations per traffic zone, but as traffic zones varied in size, we calculated the number of bus stops per hectare, and the number of rail stations per square kilometer.

**Table S2.** Association between level of income and duration of active commuter trips (in minutes).

|         |                     | <b>B</b> | <b>95% CI</b> | <b>p-value</b> | <b>N</b> |
|---------|---------------------|----------|---------------|----------------|----------|
|         |                     |          |               |                | 476      |
| Model 1 | high income (ref)   | 1        |               |                |          |
|         | medium income       | -5.13    | -9.79; -0.46  | <b>0.031</b>   |          |
|         | low income          | -2.43    | -7.64; 2.78   | 0.360          |          |
|         |                     |          |               |                | 476      |
| Model 2 | high income (ref)   | 1        |               |                |          |
|         | medium income       | -3.77    | -8.12; 0.58   | 0.148          |          |
|         | low income          | -3.54    | -8.11; 5.32   | 0.089          |          |
|         |                     |          |               |                | 476      |
| Model 3 | income (continuous) | 0.66     | -0.03; 1.35   | 0.062          |          |

Active commuting was defined as a walking trip to work of at least 10 min of duration. **Bold values** represent statistically significant coefficients on the 0.05 level. Estimates were generated using mixed multilevel linear regression models. Model 1 is an unadjusted model. Model 2 included the following covariates: age; sex (male (reference group), female); household income (low, medium, high (reference group)); household type (with children (reference group), alone, with adult family members, with non-family adults). In model 3, income is analyzed as a continuous variable and adjusted for all covariates.

**Table S3.** Correlation of land use and transport variables at the level of the home meshblocks.

|                    | <b>bus stops</b> | <b>bus frequency</b> | <b>land use mix</b> | <b>Distance to CBD</b> | <b>population density</b> | <b>housing density</b> | <b>apartment density</b> | <b>deprivation</b> | <b>walkability</b> | <b>transit score</b> |
|--------------------|------------------|----------------------|---------------------|------------------------|---------------------------|------------------------|--------------------------|--------------------|--------------------|----------------------|
| bus stops          | 1                |                      |                     |                        |                           |                        |                          |                    |                    |                      |
| bus frequency      | 0.17 **          | 1                    |                     |                        |                           |                        |                          |                    |                    |                      |
| Land-use mix       | 0.04             | 0.09 **              | 1                   |                        |                           |                        |                          |                    |                    |                      |
| Distance to CBD    | -0.25 **         | -0.53 **             | -0.18 **            | 1                      |                           |                        |                          |                    |                    |                      |
| population density | 0.15 **          | 0.41 **              | -0.15 **            | -0.43 **               | 1                         |                        |                          |                    |                    |                      |
| housing density    | 0.09 **          | 0.38 **              | -0.19 **            | -0.36 **               | 0.87 **                   | 1                      |                          |                    |                    |                      |
| apartment density  | 0.02             | 0.32 **              | -0.09 **            | -0.21 **               | 0.78 **                   | 0.47 **                | 1                        |                    |                    |                      |
| deprivation        | -0.03            | 0.03                 | 0.06 *              | 0.09 **                | 0.14 **                   | -0.03                  | 0.17 **                  | 1                  |                    |                      |
| walkability        | 0.11 **          | 0.44 **              | 0.30 **             | -0.55 **               | 0.58 **                   | 0.46 **                | 0.43 **                  | 0.21 **            | 1                  |                      |
| transit score      | 0.14 **          | 0.38 **              | 0.21 **             | -0.54 *                | 0.62 **                   | 0.43 **                | 0.49 **                  | 0.38 **            | 0.71 **            | 1                    |

\*\* Correlation is significant at the 0.01 level (2-tailed); \* Correlation is significant at the 0.05 level (2-tailed).

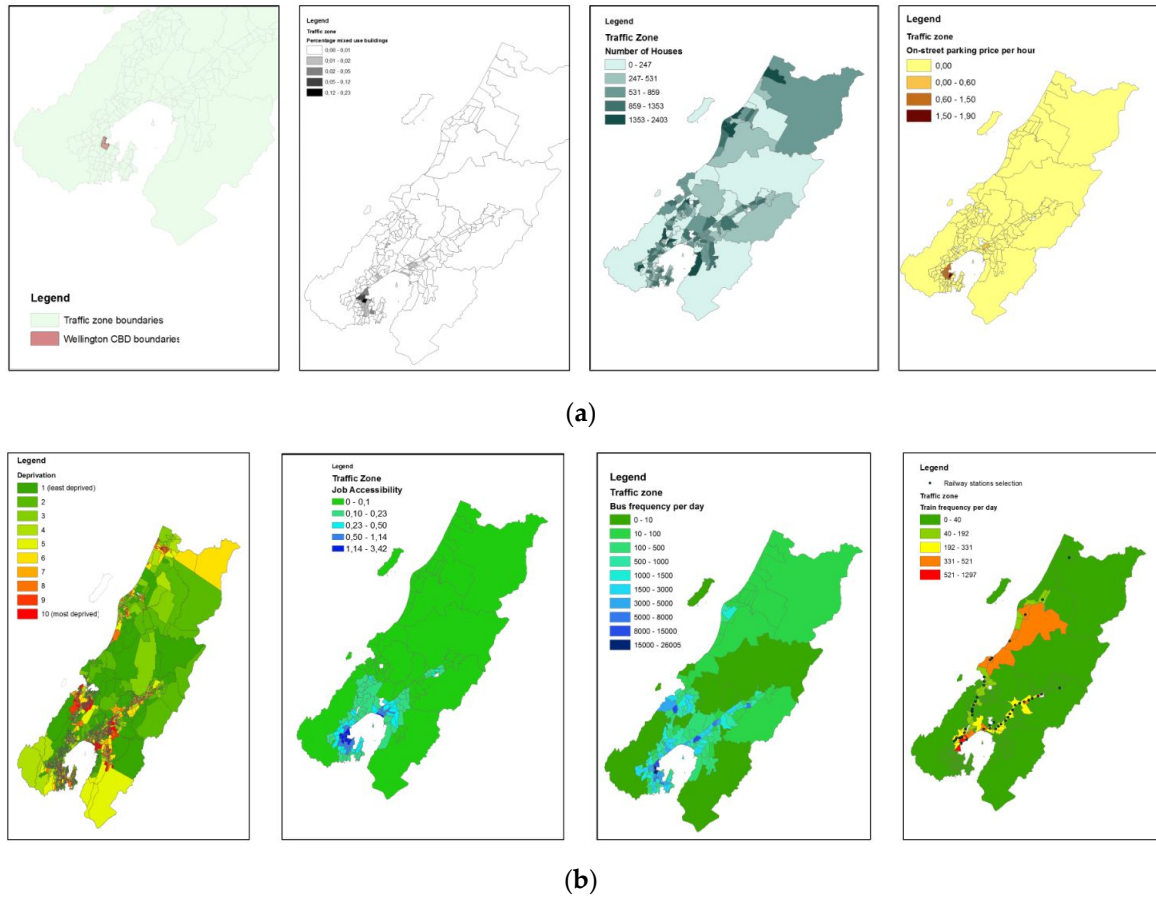

**Figure S1.** (a) Illustration of land-use characteristics within traffic zones in the Wellington region; (b) Illustration of public transport characteristics within traffic zones in the Wellington region.

**Table S4.** Association between home neighbourhood exposures and duration of active commuter trips (in minutes).

| Neighborhood Exposure            | Home Meshblock        |
|----------------------------------|-----------------------|
|                                  | <i>n</i> = 476        |
| Population density               | -0.15 (-0.36; 0.06)   |
| Housing density                  | -0.56 (-1.37; 0.24)   |
| Apartment density                | -13.50 (-34.97; 7.96) |
| Land use mix                     | 0.57 (-0.99; 2.14)    |
| Number of busstops per kilometer | -5.00 (-12.57; 2.57)  |
| Bus frequency                    | -0.11 (-0.30; 0.07)   |
| Medium deprivation               | 0.62 (-6.44; 7.68)    |
| High deprivation                 | 0.56 (-5.42; 6.55)    |
| Walkability                      | -0.11 (-0.29; 0.08)   |
| Transit score                    | -0.07 (-0.37; 0.23)   |

Active commuting was defined as a walking trip to work of at least 10 min of duration. **Bold values** represent statistically significant coefficients on the 0.05 level. Estimates were generated using logistic regression models with repeated measures with the following covariates: age; sex (male (reference group), female); household income (low, medium, high (reference group)); household type (with children (reference group), alone, with adult family members, with non-family adults); trip distance. Walkability and transit score were not adjusted for trip distance, due to high collinearity.
